# Supplementary material
Source: MDPI journal article supplement (https://www.mdpi.com/2073-4441/13/20/2914)
Supplement: s1 [file s1]

Table S2. Average concentrations of P<sub>tot</sub> and N<sub>tot</sub> in the Italian lagoons and in other world transition systems

| Surface sediments            |         |                    |                    |                                      |
|------------------------------|---------|--------------------|--------------------|--------------------------------------|
|                              | Country | Nutrient Ranges    |                    | References                           |
|                              |         | P <sub>tot</sub>   | N <sub>tot</sub>   |                                      |
|                              |         | µg g <sup>-1</sup> | mg g <sup>-1</sup> |                                      |
| Marano-Grado lagoon          | Italy   | 209-536            | 0.50-1.90          | This study                           |
| Po Delta lagoons and ponds   | Italy   | 359-1096           | 0.13-3.80          |                                      |
| Comacchio valleys            | Italy   | 324-521            | 1.58-3.50          |                                      |
| Pialassa della Baiona        | Italy   | 498-569            | 2.30-4.39          |                                      |
| Venice lagoon                | Italy   | 199-684            | 0.03-11.5          |                                      |
| Total Italian lagoons        | Italy   | 199-1096           | 0.09-12.9          |                                      |
| Keta lagoon                  | Ghana   | 130-240            | 0.1-1.0            | Sørensen et al., 2003 [57]           |
| Baleari islands              | Spain   | 51-107             | 1.7-4.4            | Lopez et al., 1996 [58]              |
| Ringkjøbing Fjord            | Denmark | 60-220             | 0.2-0.8            | Pedersen et al., 1995 [59]           |
| Mexico lagoon systems        | Mexico  | 341-1240           | 0.15-8.89          | de La Lanza-Espino et al., 2011 [60] |
| Méjean-Péròls-lagoon         | France  | 398-1147           | 1.9-6.0            | Gomez et al., 1998 [61]              |
| Camagüey Archipelago lagoons | Cuba    | up to 241          | up to 11.5         | González-De Zayas et al., 2021 [62]  |
