# Supplementary material
Source: MDPI journal article supplement (https://www.mdpi.com/2073-4441/13/20/2914)
Supplement: s1 [file s1]

Table S1. Mean, Std, Min, Max values of chemico-physical parameters in the Italian studied lagoons.

| Surface Sediments |                            |          |      |                    |       |                    |           |         |          |                    |
|-------------------|----------------------------|----------|------|--------------------|-------|--------------------|-----------|---------|----------|--------------------|
| Year              | Lagoons                    | Stations |      | Density            | Fines | Phosphorus         |           |         | Nitrogen |                    |
|                   |                            |          |      |                    |       | Total              | Inorganic | Organic | Organic  | Total              |
|                   |                            |          |      | g cm <sup>-3</sup> | %     | µg g <sup>-1</sup> |           | %       |          | mg g <sup>-1</sup> |
| 2009              | Marano-Grado lagoon        | 19       | Mean | 0.80               | 82.5  | 334                | 225       | 109     | 31.7     | 1.23               |
|                   |                            |          | Std  | 0.14               | 12.9  | 86                 | 49        | 41      | 6.0      | 0.36               |
|                   |                            |          | Min  | 0.58               | 60.0  | 209                | 160       | 49      | 20       | 0.50               |
|                   |                            |          | Max  | 1.10               | 98.3  | 536                | 344       | 192     | 44       | 1.90               |
| 2009              | Po Delta lagoons and ponds | 20       | Mean | 0.87               | 63.4  | 625                | 514       | 111     | 17.0     | 1.80               |
|                   |                            |          | Std  | 0.33               | 37.1  | 159                | 126       | 60      | 8.0      | 1.06               |
|                   |                            |          | Min  | 0.45               | 1.8   | 359                | 326       | 12      | 2.7      | 0.13               |
|                   |                            |          | Max  | 1.38               | 99.6  | 1096               | 935       | 193     | 29.1     | 3.80               |
| 2009              | Comacchio valleys          | 2        | Mean | 0.59               | 57.0  | 423                | 298       | 125     | 29.8     | 2.54               |
|                   |                            |          | Std  | 0.18               | 40.0  | 139                | 103       | 36      | 1.25     | 1.36               |
|                   |                            |          | Min  | 0.46               | 28.7  | 324                | 225       | 100     | 28.9     | 1.58               |
|                   |                            |          | Max  | 0.72               | 85.4  | 521                | 370       | 151     | 30.7     | 3.50               |
| 2009              | Pialassa della Baiona      | 3        | Mean | 0.59               | 87.5  | 717                | 537       | 180     | 24.7     | 3.09               |
|                   |                            |          | Std  | 0.11               | 3.78  | 95                 | 36        | 68      | 5.99     | 1.13               |
|                   |                            |          | Min  | 0.47               | 83.3  | 652                | 498       | 129     | 19.2     | 2.30               |
|                   |                            |          | Max  | 0.70               | 90.6  | 826                | 569       | 257     | 31.1     | 4.39               |
| 2011              | Venice lagoon              | 118      | Mean | 0.96               | 69.1  | 403                | 312       | 91      | 21.7     | 1.19               |
|                   |                            |          | Std  | 0.31               | 23.4  | 113                | 92        | 63      | 12.2     | 1.95               |
|                   |                            |          | Min  | 0.19               | 11.7  | 199                | 152       | 4       | 1.05     | 0.03               |
|                   |                            |          | Max  | 1.56               | 99.0  | 684                | 636       | 333     | 68.7     | 11.5               |
|                   | Total Stations             | 162      | Mean | 0.92               | 70.2  | 428                | 331       | 97      | 22.4     | 1.36               |
|                   |                            |          | Std  | 0.30               | 24.9  | 146                | 122       | 62      | 11.6     | 1.39               |
|                   |                            |          | Min  | 0.19               | 1.8   | 199                | 152       | 4       | 1.05     | 0.09               |
|                   |                            |          | Max  | 1.56               | 99.6  | 1096               | 935       | 333     | 68.7     | 12.9               |
